1 **NbCycB2 represses Nbwo activity via a negative feedback loop in the tobacco**  
2 **trichome development**

3 Minliang Wu<sup>1, 3</sup>, Yuchao Cui<sup>1</sup>, Li Ge<sup>1</sup>, Lipeng Cui<sup>1</sup>, Zhichao Xu<sup>1</sup>, Hongying Zhang<sup>2</sup>,  
4 Zhaojun Wang<sup>2</sup>, Dan Zhou<sup>1</sup>, Shuang Wu<sup>3</sup>, Liang Chen<sup>1\*</sup>, Hong Cui<sup>2\*</sup>

5 1. Xiamen Key Laboratory for Plant Genetics, School of Life Sciences, Xiamen  
6 University, Xiamen 361102, China

7 2. Key Laboratory for Cultivation of Tobacco Industry, College of Tobacco Science,  
8 Henan Agricultural University, Zhengzhou, 450002, China

9 3. FAFU-UCR Joint Center and Fujian Provincial Key Laboratory of Haixia Applied Plant  
10 Systems Biology, College of Horticulture, Fujian Agriculture and Forestry University,  
11 Fuzhou 350002, China

12 \* Co-Corresponding author (email: [chenlg@xmu.edu.cn](mailto:chenlg@xmu.edu.cn), [cuihonger\\_13@163.com](mailto:cuihonger_13@163.com))

13

14

15

16

17

18

19

20

21

22

23

24

25

26

27

28

29

30

31 **Running title:** Reciprocal regulation between *Nbwo* and *NbCycB2*

32

33 **Highlight**

34 *NbCycB2* is specifically expressed in trichomes of *Nicotiana benthamiana* and  
35 represses the *Nbwo* activity via a negative feedback loop in tobacco trichome  
36 development.

37

38 **Abstract:**

39 The *wo* protein and its downstream gene, *SICycB2* have been demonstrated to  
40 regulate the trichome development in tomato. It was shown that only  
41 gain-of-function mutant form of *wo*, *Wo<sup>V</sup>* (*wo* woolly motif mutant allele) could  
42 induce the increase of trichome density. However, it is still unclear the relationships  
43 between *wo*, *Wo<sup>V</sup>* and *SICycB2* in trichome regulation. In this study, we demonstrated  
44 *Nbwo* (*NbWo<sup>V</sup>*) directly regulated the expressions *NbCycB2* by binding to the  
45 promoter of *NbCycB2* and its genomic sequences. As a feedback regulation, *NbCycB2*  
46 negatively regulates the trichome formation by repressing *Nbwo* activity at protein  
47 level. We further found that the mutations of *Nbwo* woolly motif could prevent  
48 repression of *NbWo<sup>V</sup>* by *NbCycB2*, which results in the significant increase of active  
49 *Nbwo* proteins, trichome density and branches. Our results revealed a novel  
50 reciprocal mechanism between *NbCycB2* and *Nbwo* during the trichome formation in  
51 *Nicotiana benthamiana*.

52

53 **Key word:** Feedback loop; Trichome formation; *Nbwo*; *NbCycB2*; Woolly motif;  
54 L1-like box

55

56

57

58 **Introduction**

59 Trichomes are the specialized epidermal protuberances locating on aerial parts of  
60 nearly all terrestrial plants. They can be classified into various types by cell numbers

61 and shapes -- unicellular/multicellular, and glandular/non-glandular. In *Arabidopsis*, it  
62 has been well-elucidated that the development of trichomes (unicellular and  
63 non-glandular), is regulated by the trimeric MYB-bHLH-WDR protein activators  
64 complex (GL1 (Oppenheimer et al., 1991)-GL3/EGL3 (Payne et al., 2000)-TTG1(Walker  
65 et al., 1999)). This transcriptional complex activates the expression of the  
66 homeodomain protein GLABROUS2 (GL2) to induce the formation of trichomes  
67 (Rerie et al., 1994; Grebe, 2012). In addition, it triggers the expression of the single  
68 repeat R3 MYBs (including TRY (Schnittger et al., 1999), CPC (Wada et al., 1997), ETC1,  
69 ETC2, ETC3 (Kirik et al., 2004; Wester et al., 2009) and TCL2 (Gan et al., 2011)) which  
70 act as negative regulators of GL3 or EGL3 by forming a repressor complex  
71 (GL3/EGL3-TRY/CPC-TTG1) in trichome development (Wang et al., 2008; Wester et al.,  
72 2009). Thus the control of trichome development in *Arabidopsis* requires a  
73 regulatory loop including both activators and repressors (Grebe, 2012; Pattanaik et  
74 al., 2014).

75 The trichomes are multicellular glandular (GSTs) structure in approximately 30% of  
76 all vascular plants (Glas et al., 2012). Since many phytochemicals and compounds  
77 with economical values can be synthesized and secreted by multicellular GSTs  
78 (Mauricio and Rausher, 1997; Hollósy, 2002; Valkama et al., 2003; Freeman and  
79 Beattie, 2008), multicellular glandular trichomes have considerable economic  
80 potential (Sallets et al., 2014; Huchelmann et al., 2017). However, it has been  
81 demonstrated that the networks regulating unicellular trichomes did not work in the  
82 development of multicellular trichomes (Serna and Martin, 2006; Yang et al., 2011;  
83 Kang et al., 2016; Yan et al., 2016).

84 In tomato, a HD-ZIP IV transcriptional factor, *wo* protein has been demonstrated to  
85 regulate the trichome initiation (Yang et al., 2011). This HD-ZIP IV member contains  
86 four conserved domains including homeodomain domain (HD), the leucine zipper  
87 domain (LZ), the steroidogenic acute regulatory protein-related lipid transfer (START)  
88 and the START-adjacent domain (SAD). However, overexpression of *wo* failed to  
89 induce the change of trichome density, and only ectopic expression of its  
90 gain-of-function mutant alleles, *Wo<sup>V</sup>*, could cause higher density of trichomes in

91 tomato (*Solanum lycopersicum*) and tobacco (*Nicotiana tabacum*) (Yang et al., 2011;  
92 Yang et al., 2015). The *Wo<sup>V</sup>* allele has two point mutations at the C-terminal domain  
93 (Since this motif was conserved in the most *wo* alleles, we name it as woolly motif in  
94 this study). The sequence analysis revealed that *wo* protein is more similar to  
95 PROTODERMAL FACTOR2 (PDF2) and the PDF2 redundant protein -- ARABIDOPSIS  
96 THALIANA MERISTEM L1 (ATML1), both of which are involved in shoot epidermal cell  
97 differentiation (Abe et al., 2001; Ogawa et al., 2015), than GL2 in *Arabidopsis*.

98 In *Arabidopsis*, the ectopic expression of a constitutive active B-type cyclin induced  
99 mitotic divisions and resulted in the increase of multicellular trichomes (Schnittger et  
100 al., 2005). *SICycB2*, a hypothetical B-type cyclin, was reported to directly interact with  
101 *wo* to promote the development of type I trichome (Yang et al., 2011; Yang et al.,  
102 2015). Its homologous protein in *Arabidopsis* (AT5G06270) was also found to interact  
103 with GL2 or co-repressor TOPLESS proteins (Wu and Citovsky, 2017b, a). However, as  
104 reported in a recent study, overexpression of *SICycB2* resulted in non-trichome  
105 phenotype, while suppression of *SICycB2* promoted trichomes formation in tomato  
106 (Gao et al., 2017). These inconsistent results raise the important questions: what is  
107 the function of *SICycB2* in trichome formation and why the mutation of woolly motif  
108 can promote trichome formation?

109 Similar to tomato, trichomes in *Nicotiana benthamiana* are typically multicellular  
110 structures, and almost all of the trichomes in *N. benthamiana* are glandular (Fig. S1),  
111 making it a better system for studying glandular trichomes than tomato. In addition,  
112 the genome map of *N. benthamiana* has been constructed (Bombarely et al., 2012).  
113 Thus tobacco represents an excellent model plant to study the molecular mechanism  
114 of multicellular trichome formation (Goodin et al., 2008). In this study, we cloned the  
115 homologues of *wo* and *SICycB2* in *N. benthamiana* (named *Nbwo* and *NbCycB2*), and  
116 constructed a two-point mutant *Nbwo* allele, *NbWo<sup>V</sup>*. To investigate their  
117 biological functions in trichome development, we constructed overexpression and  
118 suppression transgenic lines of all genes. We demonstrated that *Nbwo* could  
119 positively regulate the expression of *NbCycB2* through targeting to the cis-element in  
120 *NbCycB2* promoter and its genomic DNA sequence. On the other hand, *NbCycB2*

121 could be a negative regulator of multicellular trichomes by directly binding and  
122 inhibiting Nbwo activity. The previous identified mutation in woolly motif (NbWo<sup>V</sup>)  
123 blocked the interaction between NbCycB2 and Nbwo, removing the repression of  
124 *Nbwo* by NbCycB2 and resulting in increased trichome density. Our results revealed  
125 the mechanisms of the interaction between *Nbwo* and *NbCycB2* in regulating the  
126 development of glandular trichomes.

127

## 128 **Materials and Methods**

### 129 **Plant materials and growth conditions**

130 Sterilized seeds of *N. benthamiana* were germinated and grown to seedlings on  
131 MS medium, which solidified with 0.8% (w/v) gellan gum under 26 °C, 14 h light/10 h  
132 dark conditions. Two-week-old plants were transferred to other sterilized bottle (for  
133 genetic transformation) or soil in pots to grow to maturity. All wild type and  
134 transgenic plants were grown in greenhouse under 26 °C, 14 h light/10 h dark  
135 condition.

### 136 **Sequence analysis**

137 The protein sequences of the homologues of *wo* and *SlCycB2* were downloaded  
138 from NCBI database (<http://www.ncbi.nlm.nih.gov/>) and Sol genomic network  
139 (Fernandez-Pozo et al., 2015) (<https://solgenomics.net/>). In order to further analyze  
140 the grouping and relatedness, the aligned sequences were used to construct the  
141 phylogenetic trees in MEGA 5 by using the maximum-likelihood (ML) criterion with  
142 100 bootstrap analysis. In addition, the relative conservation for each amino acid  
143 position in the protein sequences of Nbwo and NbCycB2 was evaluated via WebLogo  
144 (<https://weblogo.berkeley.edu/>) (Crooks et al., 2004), followed by the prediction of  
145 their conserved domains in SMART program (<https://smart.embl-heidelberg.de/>)  
146 (Letunic and Bork, 2018).

### 147 **RNA extraction and Real-time PCR**

148 Total of RNA was extracted from various tissue of plants by using the Eastep®Super  
149 Total RNA Extraction Kit (Promega). The cDNA was synthesized from Dnase I treated  
150 total RNA using M-MLV 1st Strand Kit (Invitrogen). Real-time PCR (qRT-PCR) was

151 determined by using SYBR Premix Ex Taq II (TaKaRa) and performed on ABI Stepone  
152 real-time PCR system (Applied Biosystems). L25 ribosomal protein (L18908) was used  
153 as an endogenous control (Schmidt and Delaney, 2010). Relative expression levels  
154 were determined as described previously (Guo et al., 2016). Primers are listed in  
155 Table S1.

#### 156 **Plasmid construction and *N. benthamiana* transformation**

157 To investigate the biological functions of *wo* and *SlCycB2* in *N. benthamiana*, the  
158 full-length coding sequences of two alleles of *Nbwo* and *NbCycB2* were amplified  
159 with NheI and BamHI, XbaI and BglII cloning sites respectively from the general cDNA  
160 of leaves (All the primers used in current study are provided in Table S1). In addition,  
161 to confirm the function of the tomato *Wo<sup>V</sup>* gene in tobacco trichome formation (Yang  
162 et al., 2015), an allele *NbWo<sup>V</sup>* with two point mutations at the locus 2084 (T was  
163 replaced with G, result in Ile-697 changed to Arg) and 2092 (G was replaced with T,  
164 result in Asp-700 changed to Tyr, Fig. S2c) of *Nbwo* was generated in *N. benthamiana*  
165 by using a Mutagenesis Kit (Toyobo).

166 To construct the overexpression (OE) lines of *Nbwo*, *NbWo<sup>V</sup>* and *NbCycB2*, these  
167 fragments were inserted into pXSN-HA (*Nbwo* and *NbWo<sup>V</sup>* fused with HA tag) and  
168 pXSN-FLAG (*NbCycB2* fused with Flag tag) vectors respectively under the control of  
169 CaMV 35S promoter (Chen et al., 2009). The suppression expression constructs of  
170 *Nbwo* and *NbCycB2* were performed by recombining with the RNAi vector  
171 pH7GWIWGII with LR Clonase II enzyme (Invitrogen).

172 To comprehensively understand the expression sites of *NbCycB2*, approximate  
173 2880bp upstream promoter fragments were amplified by PCR using the primers  
174 shown in Table S1. The promoter fragments were then inserted into the  
175 corresponding site of pH2GW7 vector to create the promoter-driven GFP-GUS  
176 transformation by using Pro-*NbCycB2*: GFP-GUS gene fusion (Cui et al., 2015).

177 All of these constructs were transferred into *Agrobacterium tumefaciens* strain  
178 GV3101, which were used to generate transgenic lines by using  
179 *Agrobacterium*-mediated transformation. The gene expression levels in the  
180 transgenic lines were examined by real-time PCR and western blot.

## 181 **Subcellular localization and tissue distribution**

182 The pCXDG vector (Chen et al., 2009) was used to analyse the subcellular  
183 localization of *Nbwo*, *NbWo<sup>V</sup>* and *NbCycB2*, which were fused with GFP driven by the  
184 CaMV 35S promoter (p35s:GFP-*Nbwo*, p35s:GFP-*NbWo<sup>V</sup>*, p35s:GFP-*NbCycB2*).  
185 Transformants carrying these constructs were obtained as described above and then  
186 transiently transformed into 4-week-old *N. benthamiana* leaves. After cultivation in  
187 lowlight conditions for 48-72 h, GFP was observed using confocal microscopy (LSM  
188 780, Carl Zeiss, Jena, Germany) with staining in DAPI solution (1 mg/ml) for 15 min  
189 before observation.

190 The tissue distribution assays were performed as described in the previous study  
191 (Jefferson et al., 1987). GUS staining was repeated at least three independent  
192 transgenic lines.

## 193 **Yeast hybrid assays**

194 Yeast one-hybrid assays were performed to test the specific function area of  
195 *NbCycB2* promoter binding *Nbwo*. The promoter of *NbCycB2*, separated into 5  
196 fragments (E: -1027 ~ -831 bp, D: -830 ~ -631 bp, C: -630 ~ -411 bp, B: -410 ~ -201 bp,  
197 A: -200 ~ -1bp, Fig. 2a), were amplified and inserted into the pHIS 2 vector (Clontech)  
198 (*NbCycB2*proE, *NbCycB2*proD, *NbCycB2*proC, *NbCycB2*proB, *NbCycB2*proA). Further  
199 investigation of the targeted sequences in *NbCycB2* promoter were conducted by  
200 point mutations in the two L1-like boxes in the D fragment (*NbCycB2*proD-m1,  
201 mutant one L1-like box, changed 5'-GCAAATATTTACTC-3' to 5'-GCGGGTGACTC-3';  
202 *NbCycB2*proD-m2, mutant two L1-like boxes, changed 5'-GCAAATATTTACTC-3' to  
203 5'-GCGGGTGACTC-3', and 5'-ATTTACTC-3' to 5'-GGGACTCC-3'). To test the specific  
204 region of *Nbwo* genomic sequence binding itself, four genomic fragments of *Nbwo*  
205 (G1, -8 ~ 251 bp, include T3 fragment; G2, 2169 ~ 2522 bp, include T4 fragment; G3,  
206 3485 ~ 3780 bp, include T5 fragment; G4, 4333 ~ 4660 bp, include T6 fragment, Fig.  
207 7a), were amplified and inserted into the pHIS 2 vector (Clontech) (*Nbwo*-G1,  
208 *Nbwo*-G2, *Nbwo*-G3, *Nbwo*-G4). In addition, the CDSs of *Nbwo* and *NbWo<sup>V</sup>* were  
209 inserted into vectors pGADT7 containing the GAL4 activation domain (AD) (Clontech).  
210 The plasmids were co-transformed into the Y187 yeast strain, empty AD vector was

211 provided as the negative control, and cultivated on SD/-Leu/-Trp (-L-W) medium and  
212 tested on SD/-Leu/-His/-Trp (-L-W-H) with 60 mM 3-amino-1,2,4-triazole (Sangon  
213 Biotech (Shanghai) Co., Ltd) medium.

214 The yeast two-hybrid was performed to understand the interaction between *Nbwo*  
215 and *NbCycB2*. We truncated *Nbwo* into four segments containing: HD, LZ, START and  
216 SAD domains, and fused them into AD vectors to find the target region of the  
217 interaction in *Nbwo*. In addition, the CDS of *NbWo<sup>V</sup>* was also amplified and inserted  
218 into AD vector. Each pair of AD and BD plasmids were co-transformed into the  
219 Y2HGold yeast strain. BD-53 and AD-T constructs were co-transformed in to Y2HGold  
220 as positive control, and BD-Lam and AD-T as negative control. The transformants  
221 were then cultivated on SD/-Leu/-Trp medium (DDO) and tested on SD/-Ade/  
222 -Leu/-His/-Trp with 40 mg/L X-a-Gal (QDO/X) or SD/-Ade/-Leu/-His/-Trp with 40 mg/L  
223 X-a-Gal and 400 µg/L Aureobasidin A medium (QDO/X/A).

224 Yeast three-hybrid was conducted to analyze the binding competition between  
225 *Nbwo* LZ domain (*Nbwo*-LZ) and *NbCycB2* to *Nbwo*. The *Nbwo*-LZ was fused with BD  
226 (Clontech). The *NbCycB2* was inserted into the downstream of methionine  
227 repressible promoter (PMet25: *NbCycB2*) in pBridge vector. The plasmid of  
228 BD-*Nbwo*-LZ was transferred with AD-*Nbwo* as positive control, and empty pBridge  
229 vector was transferred to with AD-*Nbwo* as negative control. The transformants  
230 were then tested on SD/-Ade/-Leu/-His/-Trp mediums with different concentrations  
231 of methionine (0, 250 µM).

### 232 **Bimolecular fluorescence complementation Assay (BiFc)**

233 In order to determine the interaction of *NbCycB2* and *Nbwo* (or *NbWo<sup>V</sup>*) in *N.*  
234 *benthamiana* protoplasts. The CDSs of *Nbwo*, *NbWo<sup>V</sup>* and *NbCycB2* were inserted  
235 into the pSAT6-cEYFP-C1-B vector (2x35s: YFP<sup>c</sup>-*Nbwo*, 2x35s: YFP<sup>c</sup>-*NbWo<sup>V</sup>*) and the  
236 pSAT6-n(1-174)EYFP-C1 vector (2x35s: YFP<sup>n</sup>-*NbCycB2*) separately (Citovsky et al.,  
237 2006). Each pair of the two plasmids were then transiently transformed into the  
238 protoplasts via PEG-calcium transfection method as described in the previous study  
239 (Yoo et al., 2007).

240 Moreover, to determine the interactions between *Nbwo* and *NbCycB2* in vivo, the



241 CDSs of *Nbwo*, *NbWo<sup>V</sup>* and *NbCycB2* were fused separately with the C-terminal  
242 fragment of YFP in p2YC vector; *Nbwo*-LZ and *NbWo<sup>V</sup>* were also fused with the  
243 N-terminal fragment of YFP in p2YN vector respectively (Shen et al., 2011). Different  
244 plasmid combinations were co-infiltrated into leaves of *N. benthamiana* as described  
245 in previous study (Shen et al., 2011).

246 The YFP fluorescence was observed by using confocal microscopy (LSM 780, Carl  
247 Zeiss, Jena, Germany). Before the observation, the transformed protoplasts were  
248 cultivation in 26 °C for 12 h, and the transformed leaves of *N. benthamiana* were  
249 cultivation in darkness for 48-72 h. Three biological repeats were observed  
250 independently for each samples.

#### 251 **Dual-luciferase (Dual-Luc) assay**

252 The regulatory effectors of 2x35s: *HA-Nbwo*, 2x35s: *HA-NbWo<sup>V</sup>* and 2x35s:  
253 *Flag-NbCycB2* were generated by using the DNA sequences with NcoI (5'-end) and  
254 BglII (3'-end) cloning sites.

255 The firefly luciferase reporters were created by inserting the B and D fragments of  
256 the *NbCycB2* promoter, and the *Renilla* luciferase was driven by the 35S promoter in  
257 the pGreen-0800-II report vector (35S: REN-*NbCycB2*proB: LUC, 35S:  
258 REN-*NbCycB2*proD: LUC). The mutants of the *NbCycB2* promoter D fragments were  
259 also constructed using a Mutagenesis Kit (35S: REN-*NbCycB2*proD-m2: LUC). The  
260 regulatory effector and the reporter were used at the ratio of 5:1 or 5:5:1 for the  
261 expression test of two or three plasmids.

#### 262 **Immunoblotting, CO-IP and pull-down assay**

263 The *N. benthamiana* leaves (~0.5 g) were homogenized with liquid nitrogen and  
264 then solubilized with 0.4 ml of lysis buffer (25 mM Tris-HCl, 2.5 mM EDTA, pH 8.0,  
265 0.05% v/v NP-40, 5% glycerol, 150 mM NaCl, 1 mM phenylmethylsulfonyl fluoride  
266 and 20 uM MG132) for 30 min at 4 °C. After solubilization, the protein extract was  
267 centrifuged at 13,000g for 10 min at 4 °C to separate the solubilized (supernatant)  
268 and non-solubilized material. Total protein (~80 µg) was then used for the  
269 immunoblotting assay. After SDS-PAGE separation, the proteins were  
270 electrophoretically transferred to a PVDF membrane for immunodetection.

271 The interaction of NbCycB2 and Nbwo dimers were determined by using co-IP  
272 assay in *N. benthamiana* protoplasts. In the expression vectors, the Nbwo protein  
273 was fused to the HA and Flag tags, respectively, and the NbCycB2 was fused to the  
274 GFP tag. Each pairs of the plasmids were transformed into the protoplasts via  
275 PEG–calcium transfection method as described in the previous study (Yoo et al.,  
276 2007). The total proteins were extracted by using lysis buffer and then incubated for  
277 3 h at 4°C with 20 ul of Anti-HA Affinity Gel (Millipore). The immunoprecipitates were  
278 washed five times with lysis buffer. The isolated proteins were detected by  
279 immunoblotting with anti-Flag or anti-GFP antibodies.

280 In the pull-down assay, the CDSs of *Nbwo*, *NbWo<sup>V</sup>* and *NbCycB2* were respectively  
281 inserted into the pET22b and PGEX-4T-1 vectors to create the fusion proteins  
282 (His-Nbwo, His-NbWo<sup>V</sup> and GST-NbCycB2), and then transformed into the *Escherichia*  
283 *coli* BL21 strain. The purified recombinant bait proteins (2 mg His-Nbwo or  
284 His-NbWo<sup>V</sup>) and 2 mg of prey proteins (GST-NbCycB2) were then mixed with 1 ml  
285 binding buffer (50 mM Tris-HCl pH 7.5, 0.6% Triton and X-100, 100 mM NaCl,). After  
286 incubation at 4 °C for 2 h, 50 µl of glutathione agarose was added to the mixtures  
287 followed by the incubation for additional 1 h. The immunoprecipitates were washed  
288 five times with binding buffer. The isolated proteins were detected by  
289 immunoblotting with anti-His or anti-GST antibodies.

#### 290 **Chromatin immunoprecipitation (ChIP PCR) assay**

291 Four weeks old *NbWo<sup>V</sup>-OE* plants were used for ChIP assay as described in previous  
292 study (Gendrel et al., 2005). The NbWo<sup>V</sup> proteins were precipitated by using HA  
293 antibody (Santa Cruz). Primers were designed to amplify 3 fragments (length ~ 120 -  
294 210 bp) within the 1.7k bp upstream sequence of the *NbCycB2* transcription start site  
295 (Fig. 2a), and 7 fragments within ~ 8.7k bp of genomic DNA sequence of *Nbwo* (Fig.  
296 7a). After the immuno-precipitation, the purified DNA was analyzed by real-time PCR  
297 with the primers of *NbCycB2* promoter and *Nbwo* genomic DNA sequence fragments  
298 (Table S1). Enrichment was calculated from the ratio of immuno-precipitated  
299 sequences.

#### 300 **Phenotype observation**

301 Images of the transgenic plants stem were obtained using Nikon camera. The  
302 observation of abaxial leaves and root hair were used an Axioplan 2 microscope (Carl  
303 Zeiss AG).

304 Leaf of transgenic line and wild type seedlings, which used for scanning electron  
305 microscope analysis, were fixed with 2% glutaraldehyde (0.1M phosphate buffer, PH  
306 7.4) at 4 °C for 12h. Then, the samples were dehydrated with a series of alcohol (10%,  
307 20%, 30%, 40%, 50%, 60%, 70%, 80%, 90% and 100%) for 20 min each time.  
308 Finally, the samples were dried in a critical point drying device (Leica EMCPD030),  
309 and coated with gold particles. The samples were observed by using a JSM-6390/LV  
310 scanning electron microscope.

### 311 **Data deposition**

312 The sequences reported in this article have been deposited in the Sol genomic  
313 network (Fernandez-Pozo et al., 2015) (<https://solgenomics.net/>) with the accession  
314 numbers as follows: *Nbwo* (Niben101Scf07790g01007.1), *Nbwo*-allele  
315 (Niben101Scf00176g11005.1), *NbCycB2* (Niben101Scf10299g00003.1),  
316 *NbCycB2*-allele (Niben101Scf10396g00002.1), *NbML1* (Niben101Scf00703g00003.1),  
317 *NbML1*-allele (Niben101Scf01158g03010.1).

318

### 319 **Results**

#### 320 **Expression and cellular analysis of *Nbwo* and *NbCycB2***

321 We obtained 14 *Nbwo* and 8 *NbCycB2* protein-related sequences from online  
322 databases (Fig. S2a, b). The full-length coding sequences of *Nbwo* and *NbCycB2*  
323 obtained in the current study contained 2,199 bp and 333 bp, respectively. One allele  
324 of each of the *Nbwo* and *NbCycB2* genes were identified via BLAST with 95.82% and  
325 95.20% identity, respectively. The amino acid analysis determined the two-point  
326 mutations at 2,084 and 2,092 of *NbWo*<sup>V</sup> could cause two amino acid replacements in  
327 the woolly motif (Ile to Arg, Asp to Tyr, Fig. S1c). Conserved domain analysis revealed  
328 that *NbCycB2* contained a WD40-like domain in the N-terminal (*NbCycB2*-WD40,  
329 including an EAR like motif) and a RING-like domain in the C-terminal (*NbCycB2*-RING)  
330 (Fig. S2d). However, no conserved domain of B-Type Cyclin protein was found in

331 NbCycB2 protein sequences.

332 The visualization of subcellular localization revealed that NbCycB2, Nbwo and  
333 NbWo<sup>V</sup> all localized to the nucleus (Fig. S3a). As shown in the self-activation assay,  
334 clones of AD-Nbwo and AD-NbWo<sup>V</sup> can grow on QDO/X/A medium compared to the  
335 positive control, which means they have strong self-activating ability, while the  
336 mutations of woolly motif did not affect Nbwo's transactivation ability (Fig. S3b).

337 As shown in Fig. S4a, the spatial expression pattern assays of *NbCycB2* and *Nbwo*  
338 indicated they were lowly expressed in roots but at a high level in the trichome  
339 containing organs. Further investigation revealed the expression of the *NbCycB2*  
340 promoter-driven GFP-GUS transgenic lines was only detected in the trichomes of  
341 leaves and stems (Fig. S4b-c). However, GUS of the Nbwo promoter-driven GUS  
342 transgenic line was strongly expressed in the basal and venous regions of young  
343 leaves (Fig. S4d).

#### 344 ***NbCycB2* negatively regulates trichome initiation**

345 Most of *NbCycB2* overexpression (OE) transgenic lines underwent a dramatic  
346 reduction of trichomes on leaves and stems (Fig. S5a, Fig. 1c, 1f). The root length and  
347 number of branch root significantly increased in *NbCycB2-OE* lines (Fig. S6). Western  
348 blot and qRT-PCR analysis showed the *NbCycB2* transcripts significantly accumulated  
349 in *NbCycB2-OE* lines, while the expression levels of *Nbwo* and endogenous *NbCycB2*  
350 were significantly reduced (Fig. S5b, c).

351 In contrast, the density of trichomes increased significantly on the leaves and  
352 stems of 16 *NbCycB2* knockdown lines (*NbCycB2-RNAi*) (Fig. S5d, Fig. 1b, 1f). The  
353 qRT-PCR analysis showed the number of trichomes negatively correlated with the  
354 expression level of *NbCycB2* (Fig. S5e), suggesting that *NbCycB2* may play a negative  
355 role in trichome initiation.

356

#### 357 ***NbWo*<sup>V</sup> positively regulates trichome initiation**

358 To confirm the function of *Nbwo*, we also generated 22 *Nbwo* knockdown  
359 transgenic plants (*Nbwo-RNAi*). Compared with the wild type, trichome densities  
360 were clearly decreased on the leaves and stems of most *Nbwo* knockdown plants

361 (Fig. S7a, e). The efficiency of RNAi mediated knockdown was confirmed by qRT-PCR  
362 in two independent lines, in which the expression of *Nbwo* and *NbCycB2* was  
363 significantly reduced (Fig. S7b).

364 As in the previous study, dramatic increases in the density and branching of  
365 trichomes were found on the leaves and stems of *NbWo<sup>V</sup>-OE* plants (Fig. 1d, 1f, S7d,  
366 S7h). Our qRT-PCR assay showed the expression levels of the *NbWo<sup>V</sup>*, endogenous  
367 *Nbwo* and *NbCycB2* genes were all significantly upregulated in transgenic lines (Fig.  
368 S7f-g). The dwarfism phenotypes were observed in the T1 plants of *NbWo<sup>V</sup>-OE* (Fig.  
369 S8).

### 370 **Over-expression of *Nbwo* also induces the dwarfism**

371 Twenty transgenic plants with overexpression of *Nbwo* (*Nbwo-OE*) were  
372 generated. Interestingly, the density of trichomes was shown to negatively correlate  
373 with the expression level of *Nbwo* in the T0 of *Nbwo-OE* plants (Fig. 2a, b).  
374 Additionally, the expression levels of *NbCycB2* were significantly reduced in trichome  
375 reduced plants (Fig. 2b). However, the decreased trichome phenotypes were not  
376 observed in T1 plants, but the higher expression level of exogenous *Nbwo* (for  
377 example, *Nbwo-OE #3*) also resulted in dwarfism similar to *NbWo<sup>V</sup>-OE* lines (Fig. 2c).  
378 Except for the dwarfism, these two lines, however had a great difference in both  
379 trichomes and root hairs. In the *Nbwo-OE #3*, the development of glandular  
380 trichomes and the development of root hairs were normal. In *NbWo<sup>V</sup>-OE #1*, the  
381 density of glandular trichomes as opposed to root hairs increased significantly (Fig.  
382 2d-f).

### 383 ***Nbwo* and *NbWo<sup>V</sup>* directly targeted the L1-like box of the *NbCycB2* promoter**

384 The expression of *NbCycB2* was significantly upregulated in the *NbWo<sup>V</sup>-OE* lines,  
385 and decreased in the *Nbwo*-RNAi lines (Fig. S7b, f). These results indicated that  
386 *NbCycB2* was positively regulated by *Nbwo* and *NbWo<sup>V</sup>*. To test whether *Nbwo*  
387 directly bound to the promoter of *NbCycB2*, *NbWo<sup>V</sup>-OE* (*NbWo<sup>V</sup>* fused with HA tag)  
388 plants were analyzed by CHIP qRT-PCR assay with an HA antibody. Strong enrichment  
389 of *NbWo<sup>V</sup>* was observed in the P2 region of the *NbCycB2* promoter in *NbWo<sup>V</sup>-OE*  
390 plants (Fig. 3a, b).

391 To further determine the specific area of the *NbCycB2* promoter binding to Nbwo,  
392 we performed yeast one-hybrid (Y1H) assays. The five truncated fragments of  
393 *NbCycB2* promoter were shown in Fig. 3a. The yeast colonies containing  
394 *NbCycB2*-proD-pHIS 2 and AD-*Nbwo* constructs were grown on the selection medium  
395 with 3-aminotriazole (60 mM) (Fig. 3c).

396 To investigate whether Nbwo and NbWo<sup>V</sup> directly affect the expression of the D  
397 fragment in vivo, we performed dual-Luc assays. The reporters 35S:  
398 REN-*NbCycB2*proD: LUC, 35S: REN-*NbCycB2*proB: LUC and the effectors were shown  
399 in Fig. 3d. As shown in Figure 3e, each pair of reporter and effector was transiently  
400 co-expressed in *N. benthamiana* protoplasts. Compared to the B fragment, when the  
401 Nbwo or NbWo<sup>V</sup> was transiently co-expressed, the D fragment-driven LUC  
402 expression accumulated significantly in the protoplasts, indicating that the D  
403 fragment of the *NbCycB2* promoter should be a specific site for Nbwo and NbWo<sup>V</sup>  
404 binding.

405 Further analysis of the targeting sequence of *NbCycB2proD* revealed this sequence  
406 contained two L1-like boxes (5'-ATTTACTC-3') (Fig. 4a). In the Y1H assay and the in  
407 vivo LUC assay, when two L1-like boxes were mutated (*NbCycB2proD-m2*), the  
408 interaction with the Nbwo protein is abolished (Fig. 4b, c). Based on these results,  
409 we inferred the L1-like boxes may be the binding target of the Nbwo and NbWo<sup>V</sup>  
410 proteins.

#### 411 **NbCycB2 represses the activity of Nbwo rather than NbWo<sup>V</sup>**

412 Since the *NbCycB2-OE* and *Nbwo-RNAi* transgenic lines shared the non-trichome  
413 phenotype, and the expression of *Nbwo* was not enhanced in the *NbCycB2-RNAi*  
414 lines (Fig. S5e), we suspect that NbCycB2 could affect Nbwo transactivation ability at  
415 protein levels. To confirm this, constructs of overexpression *Nbwo*, NbWo<sup>V</sup> and  
416 *NbCycB2* were transiently co-expressed in the leaves of the *NbCycB2pro: GFP-GUS*  
417 transgenic line using the *Agrobacterium*-mediated method (Fig. 4d). The GUS  
418 induced by the transient expression of *Nbwo-OE* was only detected in the area  
419 where there was no *NbCycB2-OE* Expression. However, the transient expression of  
420 NbWo<sup>V</sup> caused a strong GUS staining which is independent of *NbCycB2-OE*

421 expression. These results were further supported by the LUC assay, in which  
422 co-expression with *NbCycB2* could clearly repress the transactivation activity of  
423 *Nbwo*, but did not affect the *NbWo<sup>V</sup>* protein (Fig. 4e). These results suggest that  
424 *NbCycB2* may act as a negative regulator of *Nbwo* rather than *NbWo<sup>V</sup>*.

#### 425 ***NbCycB2* suppresses the transactivation ability of *Nbwo* via the direct interaction**

426 The interaction between *NbCycB2* and *Nbwo* was reported in a previous study  
427 (Yang et al., 2011). To explore which domain was involved in the physical interaction  
428 between *NbCycB2* and *Nbwo*, four truncated fragments of *Nbwo* containing HD, LZ,  
429 START and SAD were used (Fig. 5a). Y2H assays suggested that the LZ domain of  
430 *Nbwo* interacted with *NbCycB2* (Fig. 5b). The BiFC assay was further used to verify  
431 the interaction between the *Nbwo* LZ domain and *NbCycB2* in vivo (Fig. 5c).

432 To further examine if *NbCycB2* also interacts with *NbWo<sup>V</sup>*, we used yeast  
433 two-hybrid (Y2H) assays. Our results indicate that *NbCycB2* physically interacts with  
434 *Nbwo* but did not interact with *NbWo<sup>V</sup>*, suggesting that the interaction between  
435 *NbCycB2* and *Nbwo* can be reduced by mutations in the woolly motif (Fig. 6a).  
436 Consistent with the Y2H result, the interaction between *NbCycB2* and *Nbwo* or  
437 *NbWo<sup>V</sup>* was further confirmed by the pull-down assay (Fig. 6b) and the bimolecular  
438 fluorescence complementation (BiFC) assay (Fig. S10a).

439

#### 440 ***Nbwo* was restrained by *NbCycB2* through forming a homodimer**

441 It is known that the HD-Zip proteins bind to DNA as dimers by the LZ domain (Ariel  
442 et al., 2007). To verify whether *Nbwo* can be dimerized via the LZ domain, we first  
443 demonstrated in the Y2H that the LZ domain could bind to the *Nbwo* protein (Fig.  
444 S10b). In addition, BiFC assays were used to confirm the interaction between the LZ  
445 domain and *Nbwo* (or *NbWo<sup>V</sup>*) proteins in vivo (Fig. 5c).

446 To test whether the *NbCycB2* could bind at the *Nbwo* homodimer, we conducted  
447 the yeast three-hybrid (Y3H) and co-IP assays. As shown in Fig. 6c-d, *NbCycB2* could  
448 interact with the *Nbwo* dimers.

#### 449 ***Nbwo* could bind to its own genomic DNA**

450 The endogenous expression level of *Nbwo* reduced in *NbCycb2-OE* lines (Fig. S5b)

451 and increased in *NbWo<sup>V</sup>-OE* plants (Fig. 1d), indicated that *Nbwo* may be able to  
452 regulate self expression. In order to prove this hypothesis, ChIP assay was carried out  
453 to check whether *Nbwo* could bind to its genomic DNA sequence in the leaf of  
454 *NbWo<sup>V</sup>-OE* transgenic line. Interestingly, enrichment of *NbWo<sup>V</sup>* was found in the T5  
455 fragment in *NbWo<sup>V</sup>-OE* plants (Fig. 7a, b). This result was further demonstrated by  
456 using Y1H assay. Only the clones with AD-*Nbwo* (or AD-*NbWo<sup>V</sup>*) and *Nbwo*-G3-pHIS 2  
457 constructs could grow on the resistant medium, suggesting that *Nbwo* or *NbWo<sup>V</sup>*  
458 could bind to the G3 fragments (include T5 fragment, Fig. 7a) of its own genomic  
459 DNA sequences (Fig. 7c).

#### 460 **Overexpression of *NbCycB2* can reduce the dwarf phenotype of *Nbwo-OE* plants**

461 To determine whether *NbCycB2* can inhibit the transactivation activity of *Nbwo* in  
462 vivo, we crossed *NbCycB2-OE #2* T1 plant to *Nbwo-OE #3* T0 plants. As shown in Fig.  
463 8 a-b, the dwarf and short-root phenotypes of *Nbwo-OE #3* were indeed reduced by  
464 the *NbCycB2-OE #2*. The crossed F1 plants were tested using PCR (Fig. 8 c), and the  
465 expression of *NbCycB2* and *Nbwo* was also verified by qRT-PCR. Compared with T1  
466 *Nbwo-OE #3* plants, the balance between *NbCycB2* and *Nbwo* expression was  
467 restored in *NbCycB2-OE #2* and *Nbwo-OE #3* crossed F1 plants (Fig. 8 d).

468

#### 469 **Discussion**

##### 470 ***NbCycB2* negatively regulates trichome initiation**

471 It is well known that ectopic expression of a constitutive active B-type cyclin  
472 promoted the unicellular trichome differentiate to multicellular in *Arabidopsis*  
473 (Schnittger et al., 2002, 2005). The *SICycB2* gene has been reported to be a  
474 hypothesis B-type cyclin gene participating in trichome formation in tomato (Yang et  
475 al., 2011; Gao et al., 2017). However, the function of *SICycB2* during trichome  
476 development has not been well-studied.

477 In this study, we found that overexpression of *NbCycB2* caused a non-trichome  
478 phenotype, whereas inhibition of *NbCycB2* significantly increased the density of  
479 trichomes instead of branching on stems and leaves (Fig.1b, S5). Consistent with the  
480 qRT-PCR results (Fig. S4a), GUS staining assay indicated *NbCycB2* is specifically



481 expressed in the trichomes of leaves and stems (Fig. S4b-c), and *Nbwo* is expressed  
482 in the basal and venous regions of young leaves (Fig. S4d). These results suggested  
483 *NbCycB2* serves as a negative regulator of trichome initiation. None of B-type cyclin  
484 conserve domains were found in the *SlCycB2* and *NbCycB2* protein sequences (Fig.  
485 S2d). Thus, whether *SlCycB2* has the function of B type cyclin protein requires  
486 further study.

487

#### 488 ***NbWo<sup>V</sup>* and *Nbwo* directly regulate the expression of *NbCycB2* through binding to** 489 **the L1-like boxes in the promoter**

490 In previous study, *SlCycB2* has been reported to be indirectly regulated by *Wo<sup>V</sup>*  
491 (Yang et al., 2011; Yang et al., 2015). The expression level of *NbCycB2* was  
492 upregulated in overexpression of *NbWo<sup>V</sup>* plants and downregulated in *Nbwo-RNAi*  
493 lines (Fig. S7), indicating that *NbCycB2* may be the downstream gene of *Nbwo*.  
494 Additionally, the D fragments of the *NbCycB2* promoter have been shown to be the  
495 binding target of *Nbwo* and *NbWo<sup>V</sup>* through ChIP, Y1H and LUC assays (Fig. 3).  
496 Mutation of the two L1-like box sequences in *NbCycB2*proD inhibited the binding of  
497 *Nbwo* or *NbWo<sup>V</sup>* in vitro and vivo (Fig. 4b). Therefore, we proved that *NbCycB2* was  
498 directly regulated by *Nbwo* or *NbWo<sup>V</sup>* through the binding of L1-like boxes in the  
499 *NbCycB2* promoter (Fig. 4a-c). In addition, we also proved that *Nbwo* and *NbWo<sup>V</sup>* can  
500 self-regulate the endogenous expressions by binding to its own genomic DNA  
501 sequence by ChIP and Y1H assay (Fig. 7).

#### 502 **The increase of trichome density and plant dwarfism was regulated by *Nbwo*** 503 **through different pathways**

504 The *Wo* homozygous plants have been shown to cause the embryo lethality in  
505 seeds (Yang et al., 2011). We also found the overexpression of *Nbwo* or *NbWo<sup>V</sup>* genes  
506 causes abnormal embryonic development and results in dwarf phenotype in its  
507 offspring (Fig. 2c, S6). However, the trichome phenotype of *Nbwo-OE* and *NbWo<sup>V</sup>-OE*  
508 was completely different (Fig. 2e and 2f), suggesting that *Nbwo* was involved in both  
509 the regulation of the development of trihcome and embryo. The trichomes' density  
510 was decreased with the expression of *Nbwo* in T0 of *Nbwo-OE* lines (Fig.2a and 2e),

511 which suggested that high expression of *Nbwo* in wild type background could repress  
512 trichome development. Thus, we suspected the woolly motif represses *Nbwo* activity.  
513 However, the trichome density was not increased when the SAD domain deleted  
514 *Nbwo* CDS (including woolly motif) was overexpressed in the wild type plants (Fig.  
515 S9), which suggesting that woolly motif did not have repressing activity. Therefore,  
516 the decreased trichome density in high expression of *wo* gene plants requires further  
517 investigation.

#### 518 **NbCycB2 represses the transactivation activity of Nbwo at protein level**

519 The *NbCycB2* gene was proven to be directly regulated by *Nbwo* in our study.  
520 However, the similar non-trichome phenotypes of *NbCycB2-OE* and *Nbwo-RNAi*  
521 transgenic lines were found (Fig. S5a, S7a). Additionally, the expression of *Nbwo* was  
522 not increased in *NbCycB2-RNAi* plants (Fig. S5e). These results suggested that  
523 *NbCycB2* might repress the transactivation activity of *Nbwo* at protein levels. The  
524 GUS activity of the *NbCycB2pro: GFP-GUS* transgenic line was upregulated by the  
525 expression of *Nbwo* and inhibited by the co-expression of *NbCycB2* (Fig. 4d), and the  
526 same result was found in the LUC assay (Fig. 4e). Additionally, Hybridization with  
527 *NbCycB2-OE* can attenuate the dwarf phenotype of T1 *Nbwo-OE* (Fig. 8a-b). Further  
528 studies revealed that the expression of endogenous *NbCycB2* and *Nbwo* were  
529 reduced in the *NbCycB2-OE* lines (Fig. S5b). They were shown to be downstream  
530 regulatory genes of *Nbwo* (Figures 3 and 7). These results altogether supported our  
531 hypotheses that *NbCycB2* may act as a negative regulator of *Nbwo* at protein levels.

532 In a previous study, *SlCycB2* was reported to interact with *wo* protein (Yang et al.,  
533 2011). Further investigation of the interaction between *Nbwo* and *NbCycB2* revealed  
534 the dimerized LZ domain of *Nbwo* binds to *NbCycB2* (Fig. 5b, c). Through Y2H, BiFC,  
535 Y3H and co-IP assays, we also found that *Nbwo* could form a homodimer through the  
536 LZ domain, and the *NbCycB2* protein could bind to LZ domain of *Nbwo* dimers (Fig.  
537 5b-c, 6 c-d, S10b). These results indicated that *NbCycB2* may bind to *Nbwo* protein  
538 via its LZ domain to form a complex, which inhibits its transactivation ability.  
539 However, further study is required to determine whether *NbCycB2* functions  
540 similarly to its homologue gene --AT5G06270.1 which also interacts with the

541 co-repressor TOPLESS (Long et al., 2006; Szemenyei et al., 2008; Pauwels et al., 2010;  
542 Wu and Citovsky, 2017a).

543 **The interaction between Nbwo and NbCycB2 was blocked by the mutation in the**  
544 **Nbwo woolly motif**

545 In *Arabidopsis thaliana*, the feedback loop regulation mechanisms of the R3 MYB  
546 (TRY, CPC and so on) is through competitively binding to GL3/EGL3 to form a  
547 non-functional trimeric protein complex (MYB-bHLH-WDR), inhibiting the formation  
548 of trichomes (Wang et al., 2008; Wester et al., 2009). Feedback loop regulation has  
549 been reported as an effective strategy to maintain normal organism development by  
550 many HD-ZIP proteins (Ohgishi et al., 2001; Williams and Fletcher, 2005; Kim et al.,  
551 2008; San-Bento et al., 2014). However, the trichome formation was not repressed  
552 by the high expression level of *NbCycB2* in the *NbWo<sup>V</sup>-OE* plants (Fig.1d, S7d, f),  
553 which suggest that the negative effect of *NbCycB2* could be eliminated by the  
554 mutation in *NbWo<sup>V</sup>*. The LUC assay and GUS activity assay in the leaves of  
555 *NbCycB2pro: GFP-GUS* transgenic lines also supported this conclusion (Fig. 4d, e).

556 Further investigation demonstrated the interaction between NbCycB2 and Nbwo  
557 could be blocked by the mutation of woolly motif in NbWo<sup>V</sup> protein in vitro and in  
558 vivo (Fig. 6a-b, S10a), indicating that NbWo<sup>V</sup> abolishes interaction with NbCycB2 to  
559 prevent inhibition of NbCycB2. The high expressions of *NbCycB2* and endogenous  
560 *Nbwo* in *NbWo<sup>V</sup>-OE* lines also supported this conclusion (Fig. S7f).

561 In summary, through this study, we found NbCycB2 is specifically expressed in the  
562 trichomes of *N. benthamiana* and negatively affects trichome formation. Further  
563 study revealed the Nbwo and NbWo<sup>V</sup> were demonstrated to directly regulate  
564 *NbCycB2* and *Nbwo* expressions by binding to the L1-like box in the *NbCycB2*  
565 promoter and its own genomic DNA sequences. In addition, the NbCycB2 protein  
566 may via binding to the LZ domain of Nbwo dimers, which represses the activity of  
567 Nbwo and reduces the expression of *Nbwo* downstream genes, eventually leading to  
568 the inhibition of trichome initiation. By contrast, the interaction between NbCycB2  
569 and Nbwo could be blocked by the mutation in woolly motif (NbWo<sup>V</sup>), which  
570 prevents the repression by NbCycB2, and results in the dramatic increase of

571 trichome density and branching. In previous studies, since *SICycB2* is highly  
572 expressed in the *Wo* (*wo* gain-of-function mutant alleles) and *Wo<sup>V</sup>* lines and  
573 underexpressed in the *Wo-RNAi* lines, *SICycB2* is believed to promote the  
574 development of type I trichomes in tomato (Yang et al., 2011). However, the  
575 function and detailed molecular mechanisms of *NbCycB2* in regulating trichome  
576 development have not been studied. Our findings provide further insights into the  
577 regulatory network of *NbCycB2* and *Nbwo* or *NbWo<sup>V</sup>* in multicellular trichomes  
578 development of *N. benthamiana* (Fig. S11).

579

#### 580 **Acknowledgements:**

581 We would like to thank Prof. Xi Huang for kindly providing pBridge and  
582 pGreen-0800-II report vectors and thank Dr. Yongjia Zhong, Fujian Agriculture and  
583 Forestry university, for kindly providing p2YN and p2YC vectors, and thank Prof. Tao  
584 Huang, Prof. Yi Tao and Prof. Hongrui Wang for the help in the implement of  
585 experiments. The authors declare no competing financial interests. This study was  
586 supported by the State Tobacco Monopoly Administration of China [grant No.  
587 110201401003 (JY-03)], XMU Training Program of Innovation and Entrepreneurship  
588 for Undergraduates (2016Y0635) and Guizhou Science and Technology Major Project  
589 [Grant No: (2019)3001-2].

590

#### 591 **Author contributions:**

592 Liang Chen, Hong Cui, Shuang Wu and Minliang Wu conceived and designed the  
593 experiments. Minliang Wu, Yuchao Cui, Li Ge, Lipeng Cui, Zhichao Xu, Hongying  
594 Zhang, Zhaojun Wang and Dan Zhou performed the experiments and analysed the  
595 results. Minliang Wu and Shuang Wu wrote the main manuscript text. Liang Chen  
596 supervised the project.

597

#### 598 **Supplemental Data**

599 Supplemental Fig. S1: The Scanning electron micrographs (SEMs) of trichomes in the  
600 leaf of *N. benthamiana*.

601

602 Supplemental Fig. S2: Sequence analysis of *Nbwo*, *NbCycB2* and their similar  
603 proteins.

604 Supplemental Fig. S3: The subcellular localization and auto activation test of  
605 *NbCycB2*, *Nbwo* and *NbWo<sup>V</sup>*.

606 Supplemental Fig. S4: The expression pattern of *NbCycB2* and *Nbwo* in *N.*  
607 *benthamiana*.

608 Supplemental Fig. S5: Overexpression of *NbCycB2* and RNA interference of *NbCycB2*  
609 in *N. benthamiana*.

610 Supplemental Fig. S6: The root phenotypes of wild type, *NbCycB2-RNAi* #7 T1,  
611 *NbCycB2-OE* #2 T1, *NbWo<sup>V</sup>-OE* #1 T1, *Nbwo-RNAi* #2 T1 seedlings

612 Supplemental Fig. S7: RNA interference of *Nbwo* and overexpression of *NbWo<sup>V</sup>* in *N.*  
613 *benthamiana*.

614 Supplemental Fig. S8: The phenotype of *NbWo<sup>V</sup>-OE* lines.

615 Supplemental Fig. S9: The phenotype of overexpressing *Nbwo-SAD-mutant* in *N.*  
616 *benthamiana*.

617 Supplemental Fig. S10: The interaction between *Nbwo* and *NbCycb2*, *Nbwo* and  
618 *Nbwo* LZ domain.

619 Supplemental Fig. S11: A simplified model for regulation between *Nbwo* and  
620 *NbCycb2*.

621 Supplemental Table S1: Primers used in this study.

622

623 **Reference:**

624 **Abe, M., Takahashi, T., and Komeda, Y.** (2001). Identification of a cis-regulatory element for  
625 L1 layer-specific gene expression, which is targeted by an L1-specific homeodomain  
626 protein. *The Plant Journal* **26**, 487-494.

627 **Ariel, F.D., Manavella, P.A., Dezar, C.A., and Chan, R.L.** (2007). The true story of the HD-Zip  
628 family. *Trends in plant science* **12**, 419-426.

629 **Bombarely, A., Rosli, H.G., Vrebalov, J., Moffett, P., Mueller, L.A., and Martin, G.B.** (2012). A  
630 draft genome sequence of *Nicotiana benthamiana* to enhance molecular  
631 plant-microbe biology research. *Molecular Plant-Microbe Interactions* **25**, 1523-1530.

632 **Chen, S., Songkumarn, P., Liu, J., and Wang, G.L.** (2009). A versatile zero background  
633 T-vector system for gene cloning and functional genomics. *Plant physiology* **150**,  
634 1111-1121.

635 **Citovsky, V., Lee, L.-Y., Vyas, S., Glick, E., Chen, M.-H., Vainstein, A., Gafni, Y., Gelvin, S.B.,  
636 and Tzfira, T.** (2006). Subcellular localization of interacting proteins by bimolecular  
637 fluorescence complementation in planta. *Journal of molecular biology* **362**,  
638 1120-1131.

639 **Crooks, G.E., Hon, G., Chandonia, J.M., and Brenner, S.E.** (2004). WebLogo: a sequence  
640 logo generator. *Genome research* **14**, 1188-1190.

641 **Cui, Y., Rao, S., Chang, B., Wang, X., Zhang, K., Hou, X., Zhu, X., Wu, H., Tian, Z., Zhao, Z.,  
642 Yang, C., and Huang, T.** (2015). AtLa1 protein initiates IRES-dependent translation of  
643 WUSCHEL mRNA and regulates the stem cell homeostasis of *Arabidopsis* in response  
644 to environmental hazards. *Plant, Cell & Environment* **38**, 2098-2114.

645 **Fernandez-Pozo, N., Menda, N., Edwards, J.D., Saha, S., Tecle, I.Y., Strickler, S.R.,  
646 Bombarely, A., Fisher-York, T., Pujar, A., Foerster, H., Yan, A., and Mueller, L.A.**  
647 (2015). The Sol Genomics Network (SGN)—from genotype to phenotype to breeding.  
648 *Nucleic acids research* **43**, D1036-D1041.

649 **Freeman, B.C., and Beattie, G.A.** (2008). An overview of plant defenses against pathogens  
650 and herbivores. *The Plant Health Instructor*

651 <http://dx.doi.org/10.1094/PHI-I-2008-0226-01>.

652 **Gan, L., Xia, K., Chen, J.G., and Wang, S.** (2011). Functional characterization of  
653 TRICHOMELESS2, a new single-repeat R3 MYB transcription factor in the regulation  
654 of trichome patterning in Arabidopsis. *BMC plant biology* **11**, 1-12.

655 **Gao, S., Gao, Y., Xiong, C., Yu, G., Chang, J., Yang, Q., Yang, C., and Ye, Z.** (2017). The  
656 tomato B-type cyclin gene, SICycB2, plays key roles in reproductive organ  
657 development, trichome initiation, terpenoids biosynthesis and *Prodenia litura* defense.  
658 *Plant Science* **262**, 103-114.

659 **Gendrel, A.V., Lippman, Z., Martienssen, R., and Colot, V.** (2005). Profiling histone  
660 modification patterns in plants using genomic tiling microarrays. *Nature Methods* **2**,  
661 213-218.

662 **Glas, J.J., Schimmel, B.C., Alba, J.M., Escobar-Bravo, R., Schuurink, R.C., and Kant, M.R.**  
663 (2012). Plant glandular trichomes as targets for breeding or engineering of resistance  
664 to herbivores. *International journal of molecular sciences* **13**, 17077-17103.

665 **Goodin, M.M., Zaitlin, D., Naidu, R.A., and Lommel, S.A.** (2008). *Nicotiana benthamiana*: its  
666 history and future as a model for plant–pathogen interactions. *Molecular plant-microbe*  
667 *interactions* **21**, 1015-1026.

668 **Grebe, M.** (2012). The patterning of epidermal hairs in Arabidopsis--updated. *Current opinion*  
669 *in plant biology* **15**, 31-37.

670 **Guo, C., Luo, C., Guo, L., Li, M., Guo, X., Zhang, Y., Wang, L., and Chen, L.** (2016).  
671 OsSIDP366, a DUF1644 gene, positively regulates responses to drought and salt  
672 stresses in rice. *Journal of integrative plant biology* **58**, 492-502.

- 673 **Hollósy, F.** (2002). Effects of ultraviolet radiation on plant cells. *Micron* **33**, 179-197.
- 674 **Huchelmann, A., Boutry, M., and Hachez, C.** (2017). Plant Glandular Trichomes: Natural Cell  
675 Factories of High Biotechnological Interest. *Plant physiology* **175**, 6-22.
- 676 **Jefferson, R.A., Kavanagh, T.A., and Bevan, M.W.** (1987). GUS fusions: beta-glucuronidase  
677 as a sensitive and versatile gene fusion marker in higher plants. *The EMBO journal* **6**,  
678 3901.
- 679 **Kang, J.H., Campos, M.L., Zemelis-Durfee, S., Al-Haddad, J.M., Jones, A.D., Telewski, F.W.,  
680 Brandizzi, F., and Howe, G.A.** (2016). Molecular cloning of the tomato Hairless gene  
681 implicates actin dynamics in trichome-mediated defense and mechanical properties of  
682 stem tissue. *Journal of experimental botany* **67**, 5313-5324.
- 683 **Kim, Y.S., Kim, S.G., Lee, M., Lee, I., Park, H.Y., Seo, P.J., Jung, J.H., Kwon, E.J., Suh, S.W.,  
684 Paek, K.H., and Park, C.M.** (2008). HD-ZIP III activity is modulated by competitive  
685 inhibitors via a feedback loop in Arabidopsis shoot apical meristem development. *The  
686 Plant cell* **20**, 920-933.
- 687 **Kirik, V., Simon, M., Huelskamp, M., and Schiefelbein, J.** (2004). The ENHANCER OF TRY  
688 AND CPC1 gene acts redundantly with TRIPTYCHON and CAPRICE in trichome and  
689 root hair cell patterning in Arabidopsis. *Developmental Biology* **268**, 506-513.
- 690 **Letunic, I., and Bork, P.** (2018). 20 years of the SMART protein domain annotation resource.  
691 *Nucleic acids research* **46**, D493-D496.
- 692 **Long, J.A., Ohno, C., Smith, Z.R., and Meyerowitz, E.M.** (2006). TOPLESS Regulates Apical  
693 Embryonic Fate in *Arabidopsis* **312**, 1520-1523.
- 694 **Mauricio, R., and Rausher, M.D.** (1997). Experimental manipulation of putative selective



695 agents provides evidence for the role of natural enemies in the evolution of plant  
696 defense. *Evolution*, 1435-1444.

697 **Ogawa, E., Yamada, Y., Sezaki, N., Kosaka, S., Kondo, H., Kamata, N., Abe, M., Komeda, Y.,**  
698 **and Takahashi, T.** (2015). ATML1 and PDF2 Play a Redundant and Essential Role in  
699 Arabidopsis Embryo Development. *Plant & cell physiology* **56**, 1183-1192.

700 **Ohgishi, M., Oka, A., Morelli, G., Ruberti, I., and Aoyama, T.** (2001). Negative autoregulation  
701 of the Arabidopsis homeobox gene ATHB-2. *The Plant Journal* **25**, 389-398.

702 **Oppenheimer, D.G., Herman, P.L., Shan, S., Esch, J., and Marks, M.D.** (1991). A myb gene  
703 required for leaf trichome differentiation in Arabidopsis is expressed in stipules. *Cell* **67**,  
704 483-493.

705 **Pattanaik, S., Patra, B., Singh, S.K., and Yuan, L.** (2014). An overview of the gene regulatory  
706 network controlling trichome development in the model plant, Arabidopsis. *Frontiers in*  
707 *Plant Science* **5**, 259.

708 **Pauwels, L., Barbero, G.F., Geerinck, J., Tilleman, S., Grunewald, W., Perez, A.C., Chico,**  
709 **J.M., Bossche, R.V., Sewell, J., Gil, E., Garcia-Casado, G., Witters, E., Inze, D., Long,**  
710 **J.A., De Jaeger, G., Solano, R., and Goossens, A.** (2010). NINJA connects the  
711 co-repressor TOPLESS to jasmonate signalling. *Nature* **464**, 788-791.

712 **Payne, C.T., Zhang, F., and Lloyd, A.M.** (2000). GL3 encodes a bHLH protein that regulates  
713 trichome development in arabidopsis through interaction with GL1 and TTG1.  
714 *Genetics* **156**, 1349-1362.

715 **Rerie, W.G., Feldmann, K.A., and Marks, M.D.** (1994). The GLABRA2 gene encodes a homeo  
716 domain protein required for normal trichome development in Arabidopsis. *Genes &*

- 717 development **8**, 1388-1399.
- 718 **Sallets, A., Beyaert, M., Boutry, M., and Champagne, A.** (2014). Comparative proteomics of  
719 short and tall glandular trichomes of *Nicotiana tabacum* reveals differential metabolic  
720 activities. *Journal of proteome research* **13**, 3386-3396.
- 721 **San-Bento, R., Farcot, E., Galletti, R., Creff, A., and Ingram, G.** (2014). Epidermal identity is  
722 maintained by cell-cell communication via a universally active feedback loop in  
723 *Arabidopsis thaliana*. *The Plant Journal* **77**, 46-58.
- 724 **Schmidt, G.W., and Delaney, S.K.** (2010). Stable internal reference genes for normalization of  
725 real-time RT-PCR in tobacco (*Nicotiana tabacum*) during development and abiotic  
726 stress. *Molecular genetics and genomics : MGG* **283**, 233-241.
- 727 **Schnittger, A., Schöbinger, U., Stierhof, Y.-D., and Hülskamp, M.** (2002). Ectopic B-Type  
728 Cyclin Expression Induces Mitotic Cycles in Endoreduplicating *Arabidopsis* Trichomes.  
729 *Current Biology* **12**, 415-420.
- 730 **Schnittger, A., Schöbinger, U., Stierhof, Y.-D., and Hülskamp, M.** (2005). Ectopic B-Type  
731 Cyclin Expression Induces Mitotic Cycles in Endoreduplicating *Arabidopsis* Trichomes.  
732 *Current Biology* **15**, 980.
- 733 **Schnittger, A., Folkers, U., Schwab, B., Jürgens, G., and Hülskamp, M.** (1999). Generation of  
734 a spacing pattern: the role of triptychon in trichome patterning in *Arabidopsis*. *The*  
735 *Plant cell* **11**, 1105-1116.
- 736 **Serna, L., and Martin, C.** (2006). Trichomes: different regulatory networks lead to convergent  
737 structures. *Trends in plant science* **11**, 274-280.
- 738 **Shen, Q., Liu, Z., Song, F., Xie, Q., Hanley-Bowdoin, L., and Zhou, X.** (2011). Tomato

- 739           SISnRK1 protein interacts with and phosphorylates  $\beta$ C1, a pathogenesis protein  
740           encoded by a geminivirus  $\beta$ -satellite. *Plant physiology* **157**, 1394-1406.
- 741   **Szemenyei, H., Hannon, M., and Long, J.A.** (2008). TOPLESS Mediates Auxin-Dependent  
742           Transcriptional Repression During *Arabidopsis* Embryogenesis **319**,  
743           1384-1386.
- 744   **Valkama, E., SALMINEN, J.P., Koricheva, J., and Pihlaja, K.** (2003). Comparative analysis of  
745           leaf trichome structure and composition of epicuticular flavonoids in Finnish birch  
746           species. *Annals of Botany* **91**, 643-655.
- 747   **Wada, T., Tachibana, T., Shimura, Y., and Okada, K.** (1997). Epidermal cell differentiation in  
748           *Arabidopsis* determined by a Myb homolog, CPC. *Science* **277**, 1113-1116.
- 749   **Walker, A.R., Davison, P.A., Bolognesi-Winfield, A.C., James, C.M., Srinivasan, N., Blundell,**  
750           **T.L., Esch, J.J., Marks, M.D., and Gray, J.C.** (1999). The TRANSPARENT TESTA  
751           GLABRA1 locus, which regulates trichome differentiation and anthocyanin  
752           biosynthesis in *Arabidopsis*, encodes a WD40 repeat protein. *The Plant cell* **11**,  
753           1337-1349.
- 754   **Wang, S., Hubbard, L., Chang, Y., Guo, J., Schiefelbein, J., and Chen, J.G.** (2008).  
755           Comprehensive analysis of single-repeat R3 MYB proteins in epidermal cell patterning  
756           and their transcriptional regulation in *Arabidopsis*. *BMC plant biology* **8**, 1-13.
- 757   **Wester, K., Digiuni, S., Geier, F., Timmer, J., Fleck, C., and Hülkamp, M.** (2009). Functional  
758           diversity of R3 single-repeat genes in trichome development. *Development* **136**,  
759           1487-1496.
- 760   **Williams, L., and Fletcher, J.C.** (2005). Stem cell regulation in the *Arabidopsis* shoot apical

- 761 meristem. *Current opinion in plant biology* **8**, 582-586.
- 762 **Wu, R., and Citovsky, V.** (2017a). Adaptor proteins GIR1 and GIR2. II. Interaction with the  
763 co-repressor TOPLESS and promotion of histone deacetylation of target chromatin.  
764 *Biochemical and biophysical research communications* **488**, 609-613.
- 765 **Wu, R., and Citovsky, V.** (2017b). Adaptor proteins GIR1 and GIR2. I. Interaction with the  
766 repressor GLABRA2 and regulation of root hair development. *Biochemical and*  
767 *biophysical research communications* **488**, 547-553.
- 768 **Yan, T., Chen, M., Shen, Q., Li, L., Fu, X., Pan, Q., Tang, Y., Shi, P., Lv, Z., Jiang, W., Ma,**  
769 **Y.N., Hao, X., Sun, X., and Tang, K.** (2016). HOMEODOMAIN PROTEIN 1 is required  
770 for jasmonate-mediated glandular trichome initiation in *Artemisia annua*. *New*  
771 *Phytologist* **213**, 1145-1155.
- 772 **Yang, C., Gao, Y., Gao, S., Yu, G., Xiong, C., Chang, J., Li, H., and Ye, Z.** (2015).  
773 Transcriptome profile analysis of cell proliferation molecular processes during  
774 multicellular trichome formation induced by tomato *Wo (v)* gene in tobacco. *BMC*  
775 *genomics* **16**, 868.
- 776 **Yang, C., Li, H., Zhang, J., Luo, Z., Gong, P., Zhang, C., Li, J., Wang, T., Zhang, Y., and Lu,**  
777 **Y.E.** (2011). A regulatory gene induces trichome formation and embryo lethality in  
778 tomato. *Proceedings of the National Academy of Sciences of the United States of*  
779 *America* **108**, 11836-11841.
- 780 **Yoo, S.D., Cho, Y.H., and Sheen, J.** (2007). *Arabidopsis* mesophyll protoplasts: a versatile cell  
781 system for transient gene expression analysis. *Nature protocols* **2**, 1565-1572.
- 782
- 783

784 **Figure legends**

785 Fig. 1: The trichome phenotypes of *NbCycB2*, *Nbwo* and *NbWo<sup>V</sup>* transgenic seedlings  
786 (a), (b), (c), (d), (e), are the trichomes SEMs of wild type, *NbCycB2-RNAi* #7 T1,  
787 *NbCycB2-OE* #2 T1, *NbWo<sup>V</sup>-OE* #1 T1, *Nbwo-RNAi* #2 T1 10d-old-seedlings  
788 respectively. The white bar is 500  $\mu$ m. (f) The trichome density of the wild type,  
789 *NbCycB2-RNAi* #7 T1, *NbCycB2-OE* #2 T1, *NbWo<sup>V</sup>-OE* #1 T1, *Nbwo-RNAi* #2 T1  
790 10d-old-seedlings leaves were shown. “\*” indicates a difference at  $P < 0.05$  by  
791 Student's t test compared to WT. “\*\*\*” represent significant difference against WT at  
792  $P < 0.01$ . Error bars represent SD (n = 3).

793

794 Fig. 2: Over expression of *Nbwo* also induce the dwarf phenotype in *N. benthamiana*  
795 (a) Over expression of *Nbwo* was drivered by P35S promoter. The trichomes density  
796 reduced in the stems and leaves of transgenic lines. (b) The relative expression level  
797 of *Nbwo* and *NbCycB2* in the transgenic lines measured by qRT-PCR. Error bars  
798 represent SD (n = 3). (c) The root lengths were measured in the Wild type,  
799 *NbCycB2-OE* #1 T1, *Nbwo-OE* #3 T1, *Nbwo-RNAi* #2 T1 two weeks-old-seedlings. The  
800 white bar is 1 cm. (d) The root hairs of *Nbwo-OE* #3 T1 and *NbWo<sup>V</sup>-OE* #1 T1 two  
801 weeks-old-seedlings were detected by microscope. The red bar is 1 mm. (e), (f) are  
802 the SEMs of the *Nbwo-OE* #3 T1 and *NbWo<sup>V</sup>-OE* #1 T1 10d-old-seedlings respectively.  
803 The white bar is 500  $\mu$ m.

804

805 Fig. 3: *Nbwo* and *NbWo<sup>V</sup>* protein can bind *NbCycB2* promoter in vitro and vivo  
806 (a) The fragments of *NbCycB2* promoter were used to CiHP (P1, P2 and P3) and yeast  
807 one-hybrid assays (A, B, C, D and E). The numbers indicate positions of the *NbCycB2*  
808 promoter truncations. (b) Graphs show the ratio of bound promoter fragments  
809 (P1-P3) versus total input detected by qRT-PCR after immuno-precipitation in  
810 HA-*NbWo<sup>V</sup>* by HA antibodies. Data shown are mean  $\pm$  SE (n = 3). (c) One-hybrid (Y1H)  
811 assays were used to determine the interaction of *NbCycB2* promoter fragments (A, B,  
812 C, D, E) bait constructs and AD-*Nbwo* or empty pGADT7 constructs in Y187 yeast  
813 strains. (d) The schematic diagram of the effectors and reporters constructs were

814 used in the LUC assay. (e) The relative reporter activities were measured in *N.*  
815 *benthamiana* protoplasts after transiently transformed the effector and reporter  
816 constructs. The relative LUC activities normalized to the REN activity are shown  
817 (LUC/REN). The difference between combinations were detected by Student's t test.  
818 "\*\*\*" present that the LUC activity is significantly different ( $P < 0.01$ ). Error bars  
819 represent SD ( $n = 3$ ).

820

821 Fig. 4: NbCycB2 can suppress the function of Nbwo, but has no effect on NbWo<sup>V</sup>

822 (a) The DNA sequences of wild type *NbCycB2* promoter (ProD) and mutant fragments  
823 were shown. L1-like boxes were indicated by using gray arrow. The mutated bases in  
824 the m1 and m2 sequences are shown by a dividing line. (b) One-hybrid (Y1H) assays  
825 were used to detected the interaction between mutantD fragments of *NbCycB2*  
826 promoter bait constructs and AD-*Nbwo* or AD-*NbWo*<sup>V</sup> in Y187 yeast strains, the  
827 empty pGADT7 construct as the control. (c) Relative reporter activity was measured  
828 in *N. benthamiana* protoplasts after transiently co-transformed the effector and  
829 reporter constructs. The relative LUC activities normalized to the REN activity are  
830 shown (LUC/REN). "\*\*\*" present that the LUC activity has significant difference  
831 between the D and m2 fragments reporter when their co-transformed with *Nbwo* or  
832 *NbWo*<sup>V</sup> effector respectively ( $P < 0.01$ , Student's t test). Error bars represent SD ( $n =$   
833  $3$ ). (d) The GUS staining of the *proNbCycB2: GFP-GUS* transgenic line leaves, when  
834 co-expressing *P35S: Nbwo* and *P35S: NbCycB2*, *P35S: NbWo*<sup>V</sup> and *P35S: NbCycB2*. The  
835 area of red circle was injected with *P35S: Nbwo* GV3101 strain; the area of Green  
836 circle was injected with *P35S: NbWo*<sup>V</sup> GV3101 strain; the area of blue circles were  
837 injected with *P35S: NbCycB2* GV3101 strain. (e) The LUC activity of co-transforming  
838 the effector and reporter constructs were measured. "\*\*\*" present that the LUC  
839 activity is significantly different between *Nbwo* and *NbWo*<sup>V</sup> effector when they  
840 co-transformed with *NbCycB2* effector respectively ( $P < 0.01$ , Student's t test). Error  
841 bars represent SD ( $n = 3$ ).

842

843 Fig. 5: NbCycB2 protein interact with LZ domain of the Nbwo protein in vitro and vivo

844 (a) Schematic diagrams of Nbwo protein domain constructs. The numbers indicate  
845 positions of the first and the last amino acid of the Nbwo truncations. (b) Interaction  
846 between NbCycB2 and domains of Nbwo protein were determined by YH2 system. (c)  
847 The interaction between Nbwo and NbCycB2 or itself were demonstrated by BiFC  
848 assay. Each indicated pair of constructs were co-infiltrated into leaves of *N.*  
849 *benthamiana* (Bar, 50  $\mu$ m).

850

851 Fig. 6: Mutation of woolly motif reduce the interaction between Nbwo and NbCycB2

852 (a) Interaction between NbCycB2 and Nbwo or NbWo<sup>V</sup> proteins were determined by  
853 YH2 system. Blue clones grown on the QDO/X/A medium indicates positive  
854 protein-protein interactions. (b) The pull down assay between Nbwo or NbWo<sup>V</sup> with  
855 NbCycB2 proteins. Only recombinant HIS-Nbwo protein can co-precipitate with  
856 GST-NbCycB2 protein. (c) The competitive binding between NbCycB2 and LZ domain,  
857 LZ domain and Nbwo were determined by Yeast three-hybrid assays. (d) The co-IP  
858 assay between NbCycB2 and Nbwo dimers. The total protein immunoprecipitation  
859 was performed by using anti-HA beads.

860

861 Fig. 7: Nbwo and NbWo<sup>V</sup> can bind at itself genomic DNA sequences

862 (a) The fragments of *Nbwo* genomic sequences were used to ChIP (T1, T2, T3, T4, T5,  
863 T6 and T7) and yeast one-hybrid assays (G1, G2, G3 and G4). The bar present 1 kb  
864 DNA sequences. (b) Graphs show the ratio of bound genomic fragments (T1-T7)  
865 versus total input detected by real-time PCR after immuno-precipitation in  
866 *NbWo<sup>V</sup>-OE* lines by HA antibodies. Data shown are mean  $\pm$  SE (n = 3). (c) One-hybrid  
867 (Y1H) assays were used to determine the interaction of *Nbwo* genomic sequence  
868 fragments (G1, G2, G3, G4) bait constructs and AD-Nbwo, AD-NbWo<sup>V</sup> or empty  
869 pGADT7 constructs in Y187 yeast strains. The clones grown on the SD/-Leu/-His/-Trp  
870 (-L-W-H) with 60 mM 3-AT medium indicates the interaction between DNA fragment  
871 and Nbwo or NbWo<sup>V</sup> proteins.

872

873 Fig. 8: Hybridization between *Nbwo-OE* and *NbCycB2-OE* plants

874 (a), (b) The phenotype of *NbCycB2-OE* #2 and *Nbwo-OE* #3 hybridization F1 two  
875 weeks old (a) and mature (b) plants were shown. “I”present wild type *N.*  
876 *benthamiana*, “II”present *NbCycB2-OE/WT* hybrid T1 plants, “III”present *NbCycB2-OE*  
877 #2 and *Nbwo-OE* #3 hybridization F1 plants, “IV”present *Nbwo-OE* #3/*WT* hybrid T1  
878 plants. (c) F1 plants were tested by using PCR. Wild type as a negative control,  
879 *Nbwo-OE* #3 and *NbCycB2-OE* #2 as positive controls. No DNA band was detected in  
880 the wild type *N. benthamiana*. A ~330 bp DNA band was detected in *NbCycB2-OE* #2  
881 lines. A ~2199 bp DNA band was detected in *Nbwo-OE* #3 lines. In contrary, two  
882 bands were detected in *NbCycB2-OE* #2 and *Nbwo-OE* #3 hybridization F1 plants. (d)  
883 The relative expression levels of *Nbwo* and *NbCycb2* were measured by qRT-PCR in  
884 F1 plants. Data are given as means SD (n = 3).  
885



(a)

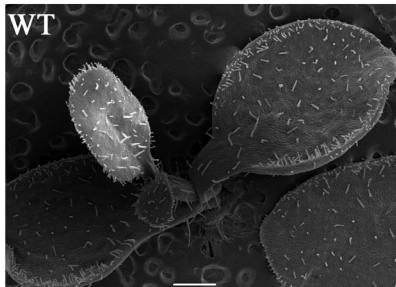

(b)

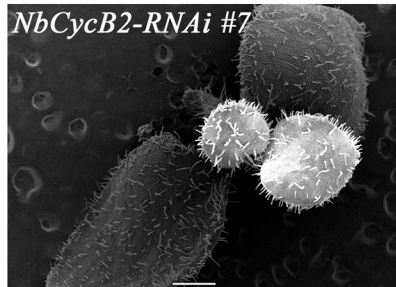

(c)

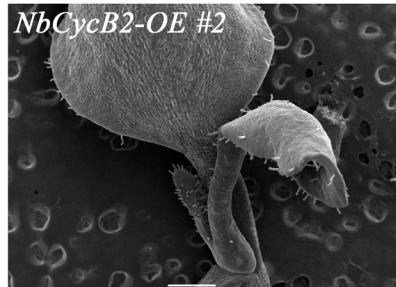

(d)

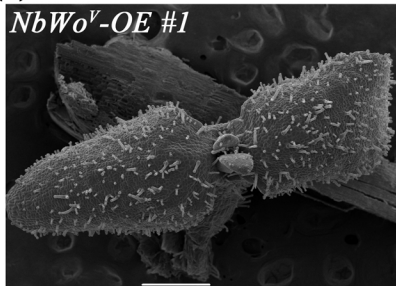

(e)

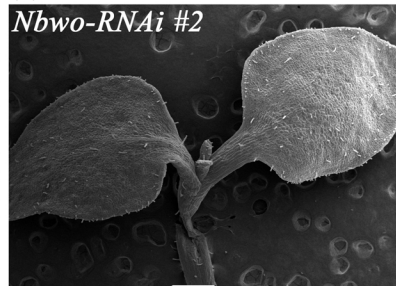

(f)

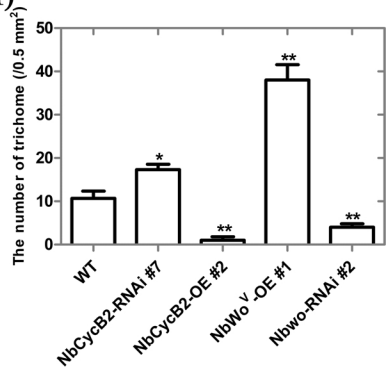

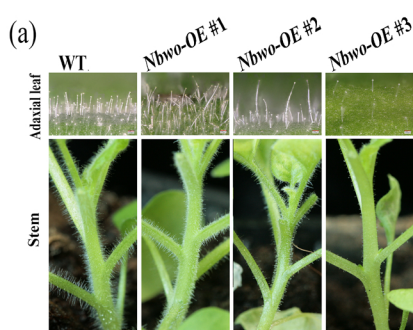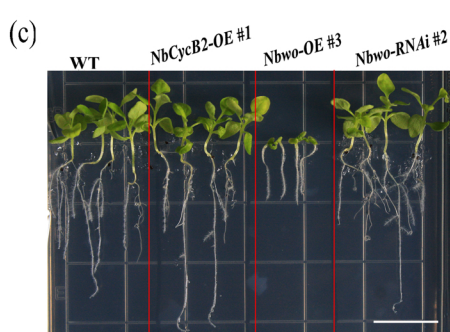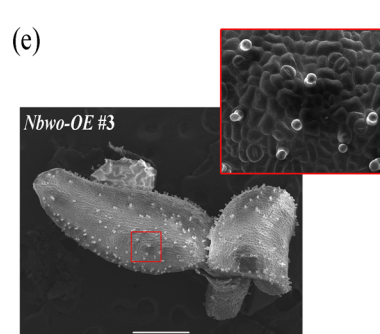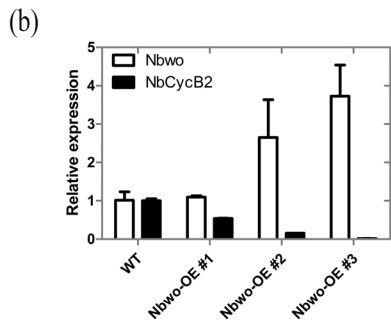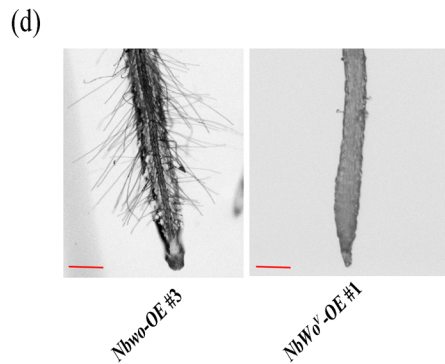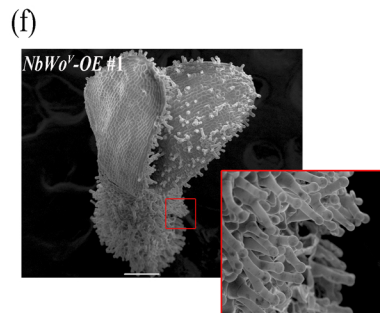

(a)

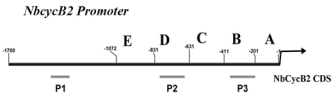

(b)

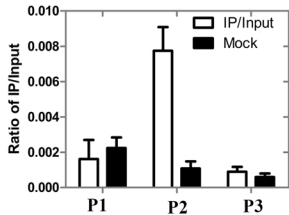

(c)

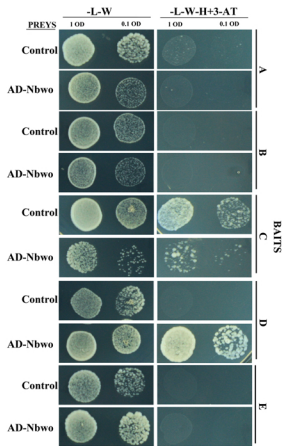

(d)

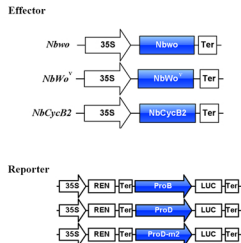

(e)

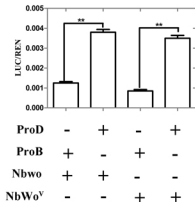

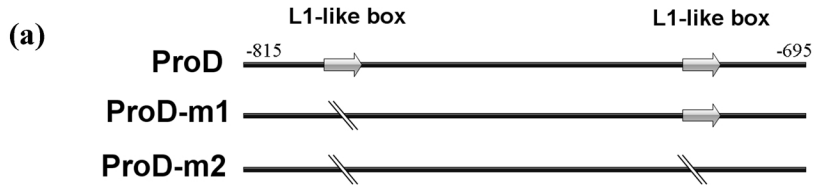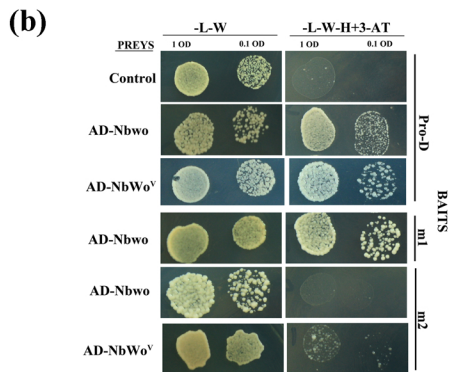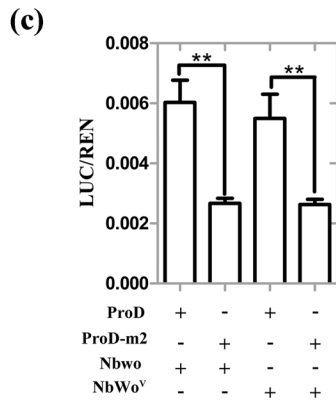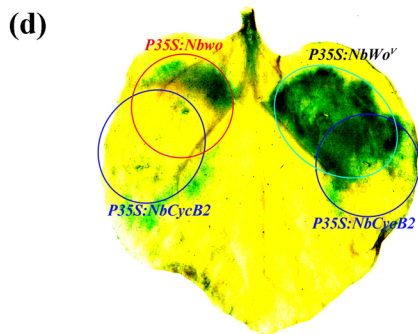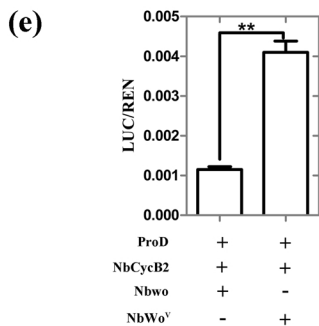

(a)

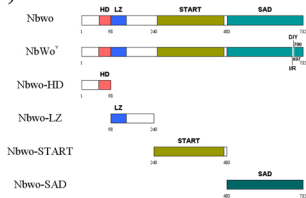

(b)

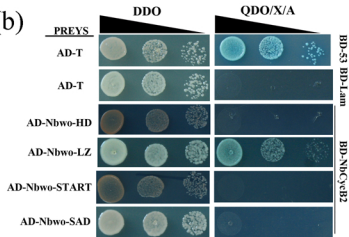

(c)

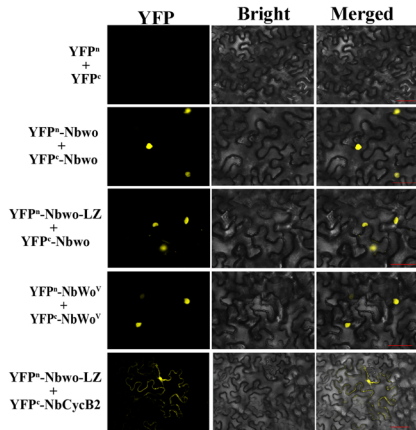

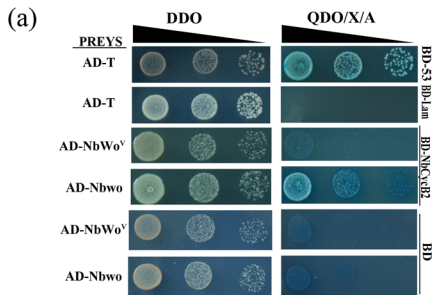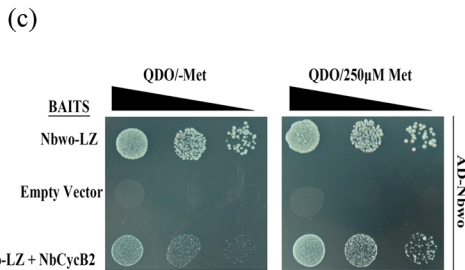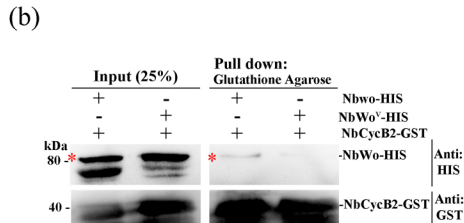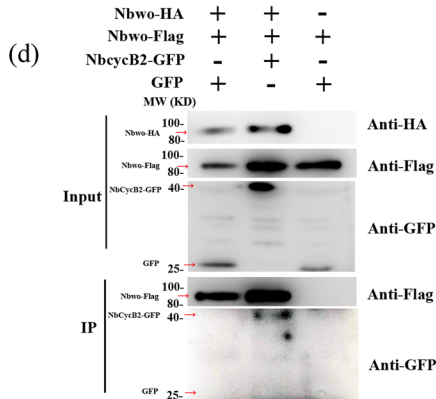

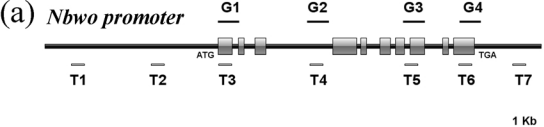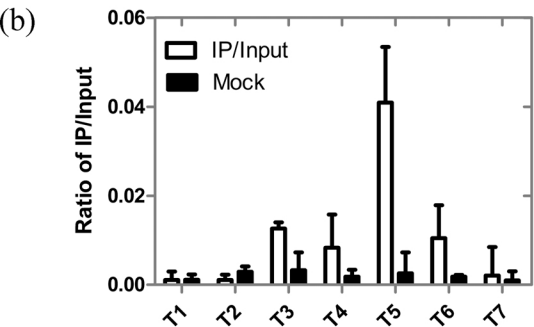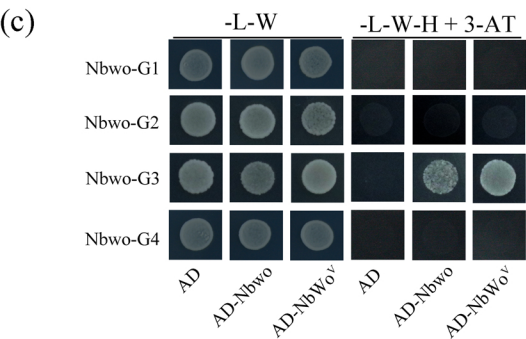

(a)

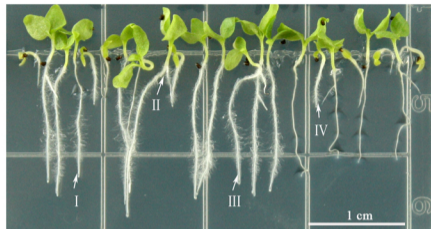

I: WT

II: *NbcycB2*-OE #2 / WTIII: *Nbwo*-OE #3 / *NbcycB2*-OE #2IV: *Nbwo*-OE #3 / WT

(c)

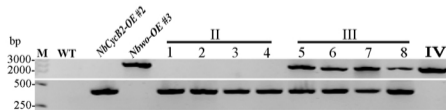

(b)

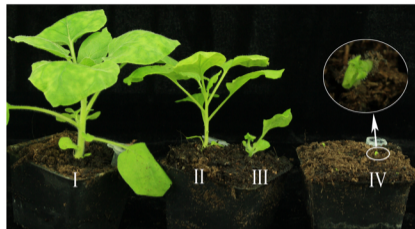

(d)

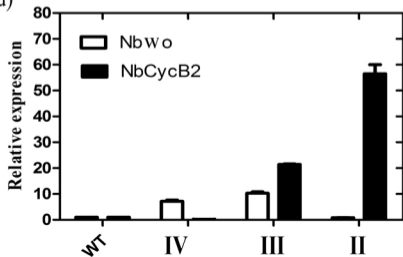

Source: https://www.biorxiv.org/content/10.1101/740126v1.full.pdf
